# Supplementary material
Source: PubMed Central journal article supplement (PMC5682025)

**A**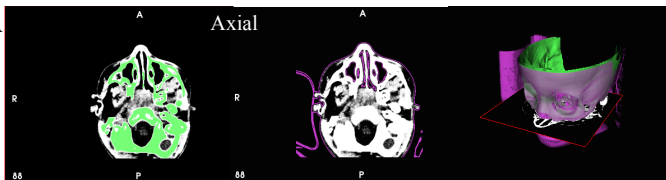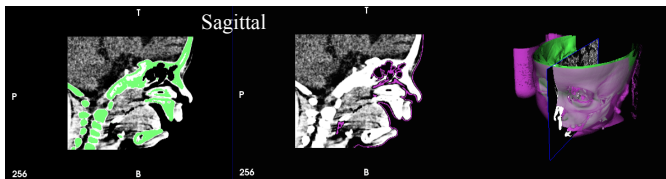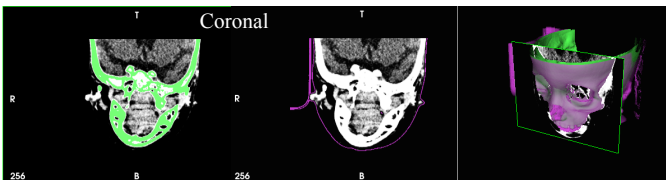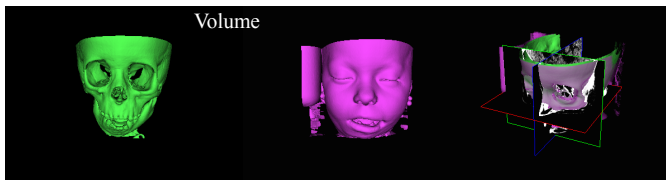**B**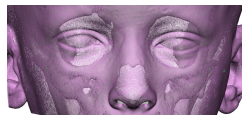**C**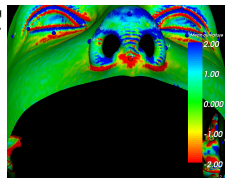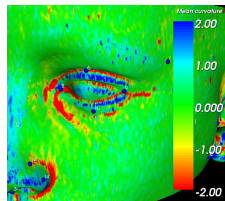

Supplement: NIHMS916172-supplement-SUPP1.pdf [file NIHMS916172-supplement-SUPP1.pdf]

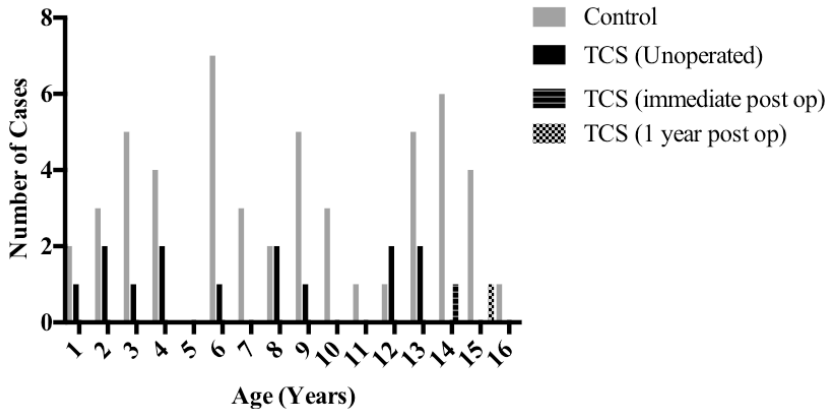

Supplement: NIHMS916172-supplement-SUPP2.pdf [file NIHMS916172-supplement-SUPP2.pdf]

**A**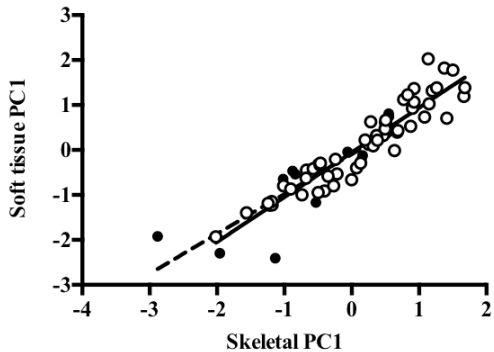**B**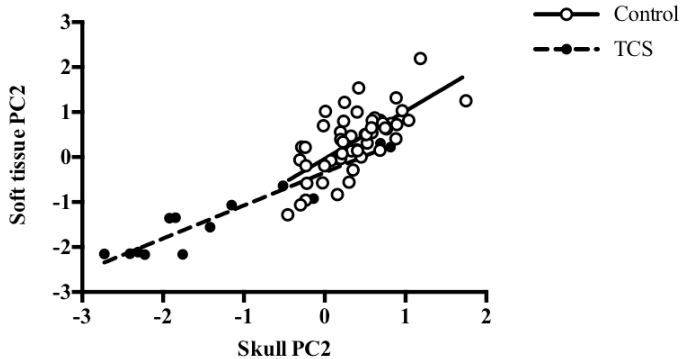

Supplement: NIHMS916172-supplement-SUPP3.pdf [file NIHMS916172-supplement-SUPP3.pdf]
